# Supplementary material for: CoSe2 nanoparticles anchored on dual 1D carbon nanotubes/N-doped carbon nanofibers as high-performance anodes for sodium-ion storage
Source: Royal Society of Chemistry journal article supplement (doi:10.1039/d3dt00151b), 2023-01-01
Supplement: d3dt00151b1.pdf [file d3dt00151b1.pdf]

Supporting Information

**CoSe<sub>2</sub> nanoparticles anchored on dual 1D carbon nanotubes/N-doped carbon nanofibers as high-performance anodes for sodium-ion storage**

Qilei Jiang,<sup>a</sup> Xu Han,<sup>a</sup> Mengling Zhang,<sup>a</sup> Zheng Qin,<sup>a</sup> Xianggang Huang,<sup>a</sup> Yan Hou,<sup>a</sup> Xueqin Cao,<sup>a</sup> Jianping Lang<sup>a,b</sup> and Hongwei Gu<sup>\*a</sup>

<sup>a</sup> *College of Chemistry, Chemical Engineering and Materials Science, Collaborative Innovation Center of Suzhou Nano Science and Technology, Soochow University, Jiangsu, 215123, P. R. China*

<sup>b</sup> *State Key Laboratory of Organometallic Chemistry, Shanghai Institute of Organic Chemistry, Chinese Academy of Sciences, Shanghai 200032, P. R. China*

**\*Corresponding authors**

E-mail: hongwei@suda.edu.cn and jplang@suda.edu.cn

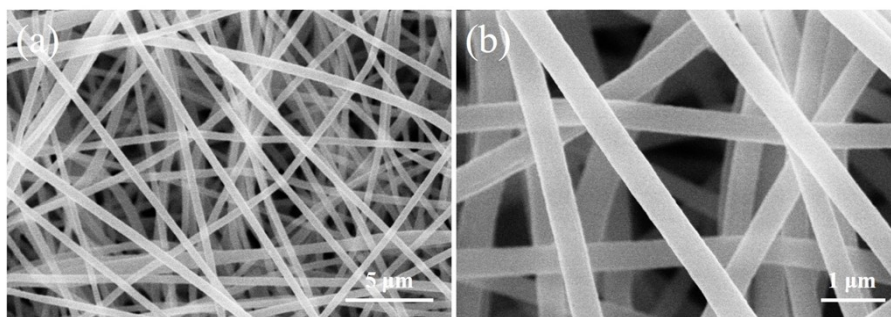

**Fig. S1** SEM images of the raw fibers at different sizes.

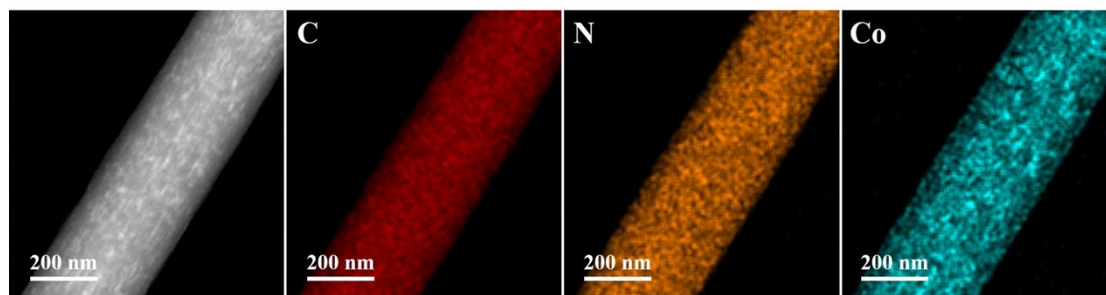

**Fig. S2** EDS elemental (C, N and Co) mapping of Co-NFs.

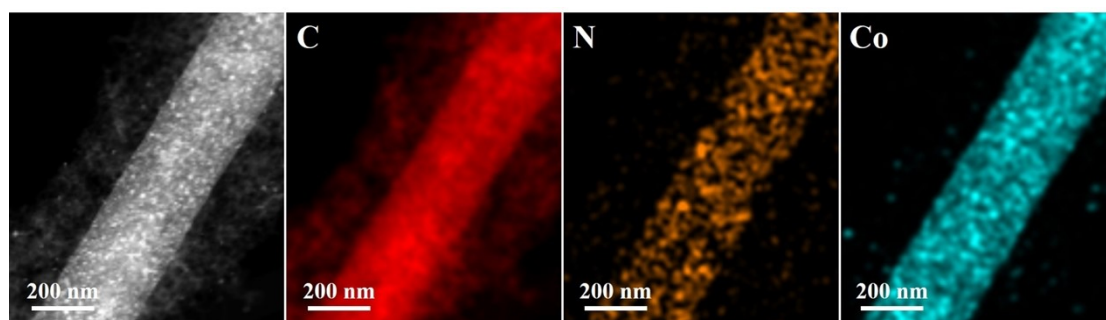

**Fig. S3** EDS elemental (C, N and Co) mapping of Co@CNTs/N-CNFs.

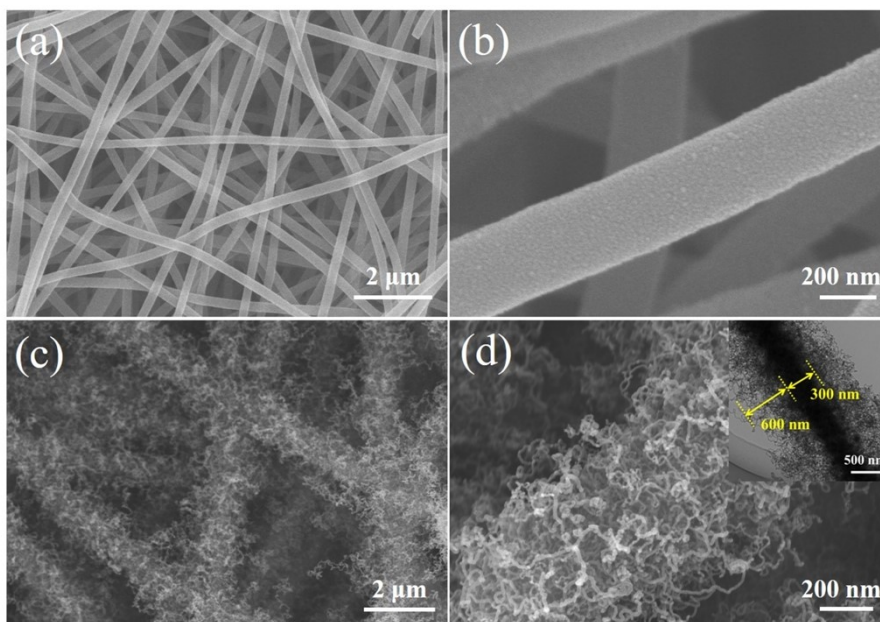

**Fig. S4** (a, b) SEM images of Co@CNTs/N-CNFs-600, (c, d) SEM image (inset is the TEM) of Co@CNTs/N-CNFs-800.

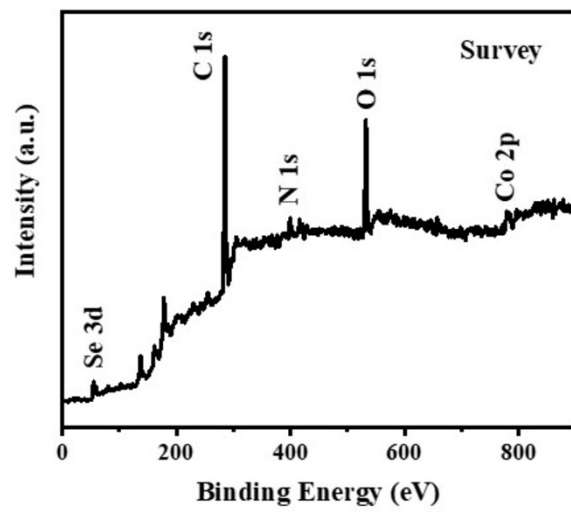

Fig. S5 Survey XPS spectra of CoSe<sub>2</sub>@CNTs/N-CNFs.

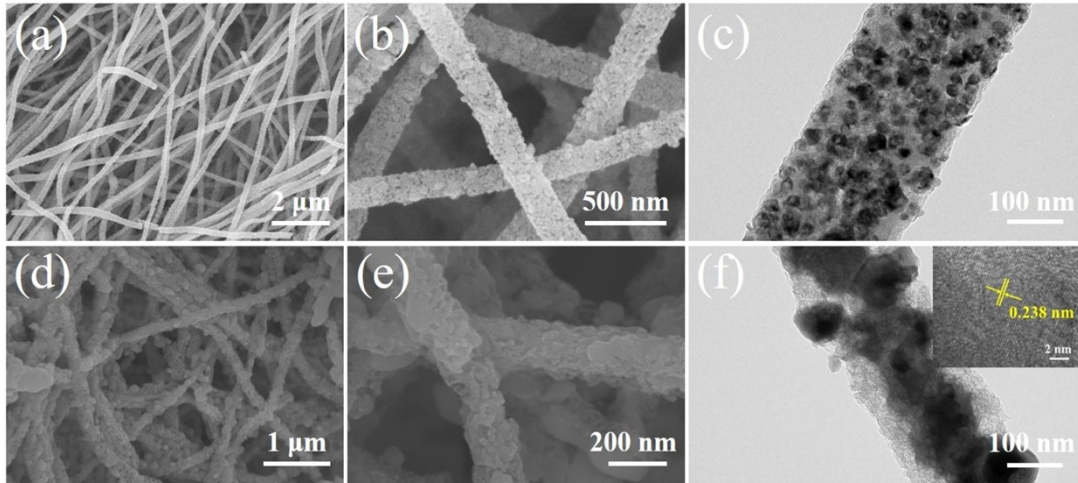

**Fig. S6** (a, b) SEM images, (c) TEM image of Co@N-CNFs, (d, e) SEM images and (f) TEM image (inset is the HRTEM image of CoSe<sub>2</sub> particle in N-CNF) of CoSe<sub>2</sub>@N-CNFs.

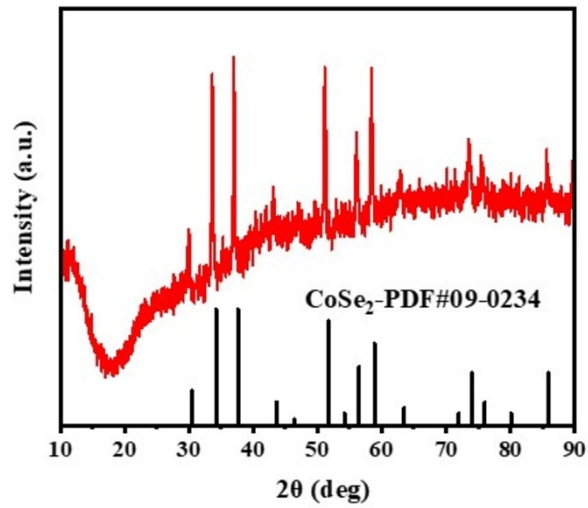

**Fig. S7** XRD pattern of CoSe<sub>2</sub>@CNFs.

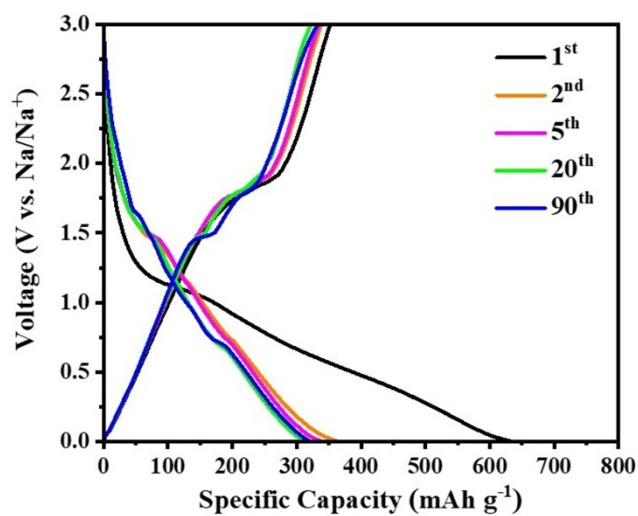

Fig. S8 Galvanostatic charge-discharge profiles of  $\text{CoSe}_2@N\text{-CNFs}$  of different cycles at  $0.1\text{A g}^{-1}$ .

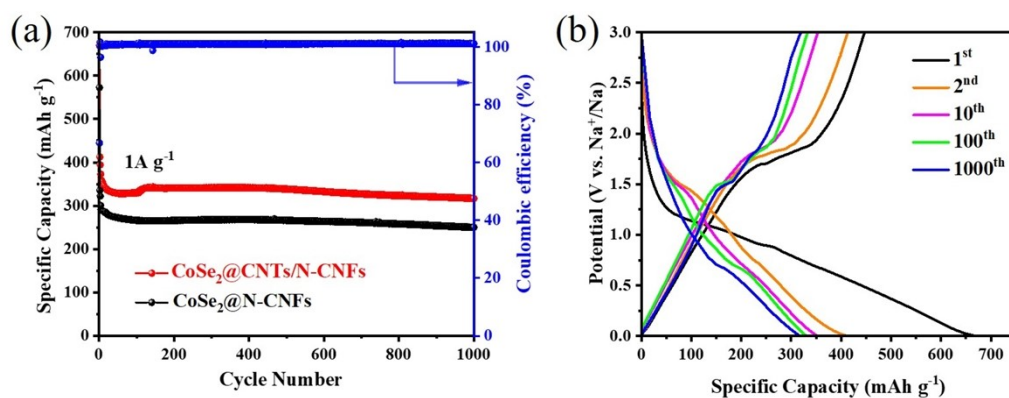

Fig. S9 (a) Cycling properties at  $1\text{A g}^{-1}$ , (b) galvanostatic charge-discharge profiles of  $\text{CoSe}_2@CNTs/N\text{-CNFs}$  of different cycles at  $1\text{A g}^{-1}$ .

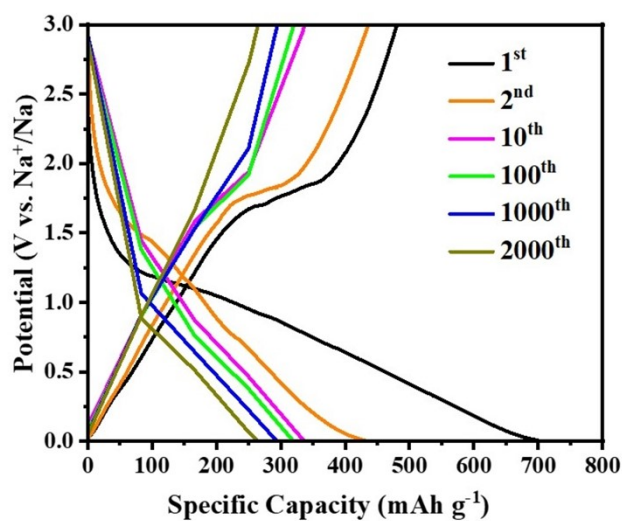

Fig. S10 Galvanostatic charge-discharge profiles of  $\text{CoSe}_2@CNTs/N\text{-CNFs}$  of different cycles at  $5\text{A g}^{-1}$ .

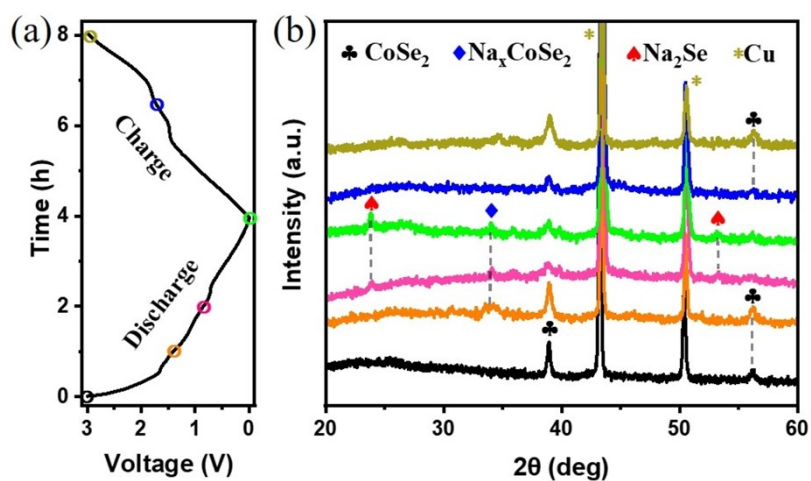

**Fig. S11** (a) Charge and discharge curve after activation at  $0.1 \text{ A g}^{-1}$ , (b) ex situ XRD patterns of CoSe<sub>2</sub>@CNTs/N-CNFs for SIB.

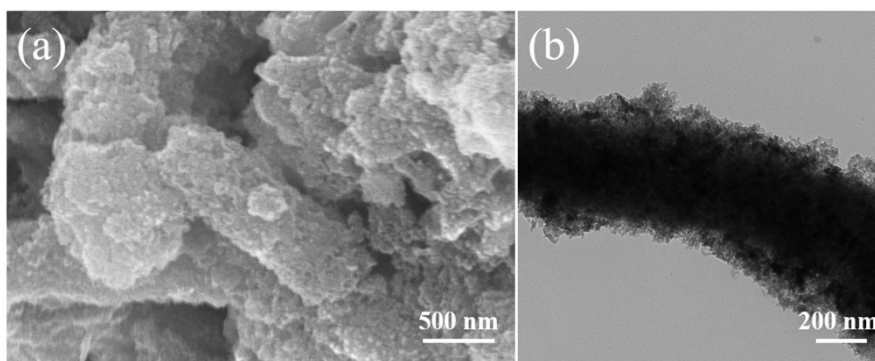

**Fig. S12** SEM and TEM images of CoSe<sub>2</sub>@CNTs/N-CNFs after 1000 sodiation/desodiation cycles.
